# Supplementary material for: Enrichment of Quercetin from Winemaking Residual Diatomaceous Earth via a Tailor-Made Imprinted Adsorbent
Source: MDPI journal article supplement (doi:10.3390/molecules27196406), 2022-09-28
Supplement: s1 [file s1]

## Supplementary material

# Enrichment of Quercetin from Winemaking Residual Diatomaceous Earth via a Tailor-Made Imprinted Adsorbent

Amir Bzainia , Rolando C.S. Dias  and Mário Rui P.F.N. Costa 

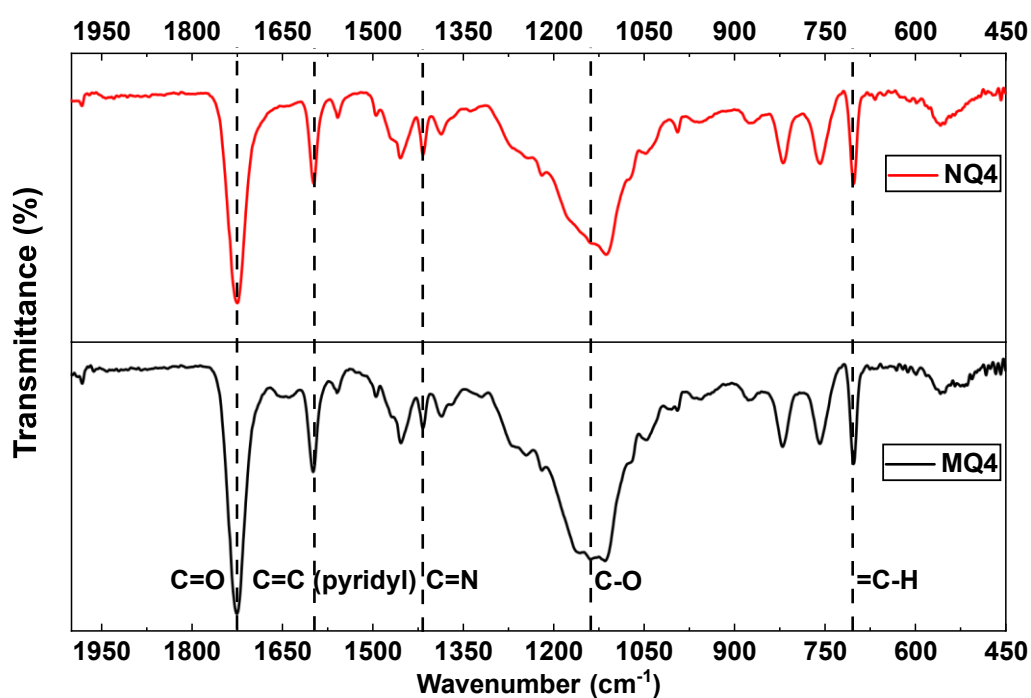

Figure S1. FTIR spectra of MQ4 and NQ4

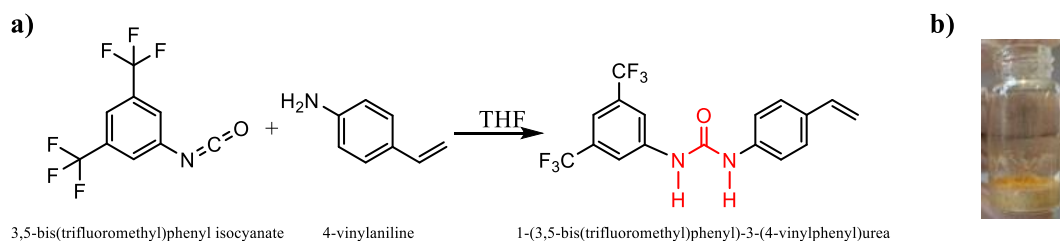

Figure S2. a) Reaction mechanism of the 4VAN-BTPI monomer; b) Photograph of the synthesized urea monomer.

**Table S1.** Batch results for quercetin 0.2mM in 8/2 EtOH/Water

| Material                         | MQ1   | NQ1   | MQ2   | NQ2   | MQ3   | NQ3   | MQ4   | NQ4   | Reillex<br>425 | Reillex<br>402 | DAX8  | XAD4  | XADHP7 | SiO <sub>2</sub> |
|----------------------------------|-------|-------|-------|-------|-------|-------|-------|-------|----------------|----------------|-------|-------|--------|------------------|
| Q (μmol/g) 1 <sup>st</sup> assay | 1.180 | 0.948 | 2.697 | 1.886 | 3.956 | 3.250 | 3.485 | 3.500 | 2.839          | 3.901          | 0.984 | 0.683 | 1.084  | 0.695            |
| Q (μmol/g) 2 <sup>nd</sup> assay | 1.136 | 0.767 | 2.445 | 2.005 | 3.362 | 2.910 | 2.837 | 3.091 | 2.41940        | 3.071          | 0.749 | 0.751 | 0.708  | 0.570            |
| Q (μmol/g) 3 <sup>rd</sup> assay | 1.274 | 1.073 | 2.824 | 2.274 | 3.385 | 2.891 | 3.227 | 3.413 | 2.368          | 3.159          | 0.757 | 0.673 | 0.717  | 0.618            |
| Q (μmol/g) Average               | 1.197 | 0.929 | 2.655 | 2.055 | 3.568 | 3.017 | 3.183 | 3.335 | 2.542          | 3.377          | 0.830 | 0.702 | 0.836  | 0.628            |
| Standard deviation               | 0.057 | 0.125 | 0.157 | 0.162 | 0.274 | 0.165 | 0.266 | 0.175 | 0.211          | 0.372          | 0.108 | 0.034 | 0.175  | 0.051            |

**Table S2.** Batch results for ferulic acid 0.2mM in 8/2 EtOH/Water

| Material                         | MQ3   | NQ3   |
|----------------------------------|-------|-------|
| Q (μmol/g) 1 <sup>st</sup> assay | 2.537 | 1.491 |
| Q (μmol/g) 2 <sup>nd</sup> assay | 2.246 | 1.297 |
| Q (μmol/g) 3 <sup>rd</sup> assay | 2.234 | 1.817 |
| Q (μmol/g) Average               | 2.339 | 1.535 |
| Standard deviation               | 0.140 | 0.214 |

**Table S3.** Batch results for polydatin 0.2mM in 8/2 EtOH/Water

| Material                         | MQ3   | NQ3   |
|----------------------------------|-------|-------|
| Q (μmol/g) 1 <sup>st</sup> assay | 2.794 | 2.597 |
| Q (μmol/g) 2 <sup>nd</sup> assay | 2.238 | 1.969 |
| Q (μmol/g) 3 <sup>rd</sup> assay | 2.903 | 2.730 |

---

|                                 |       |       |
|---------------------------------|-------|-------|
| Q ( $\mu\text{mol/g}$ ) Average | 2.645 | 2.432 |
| Standard deviation              | 0.291 | 0.332 |

---
